# Supplementary material for: Unidirectional transitions in nectar gain and loss suggest food deception is a stable evolutionary strategy in Epidendrum (Orchidaceae): insights from anatomical and molecular evidence
Source: PubMed Central journal article supplement (PMC6122447; doi:10.1186/s12870-018-1398-y), 2018-09-04

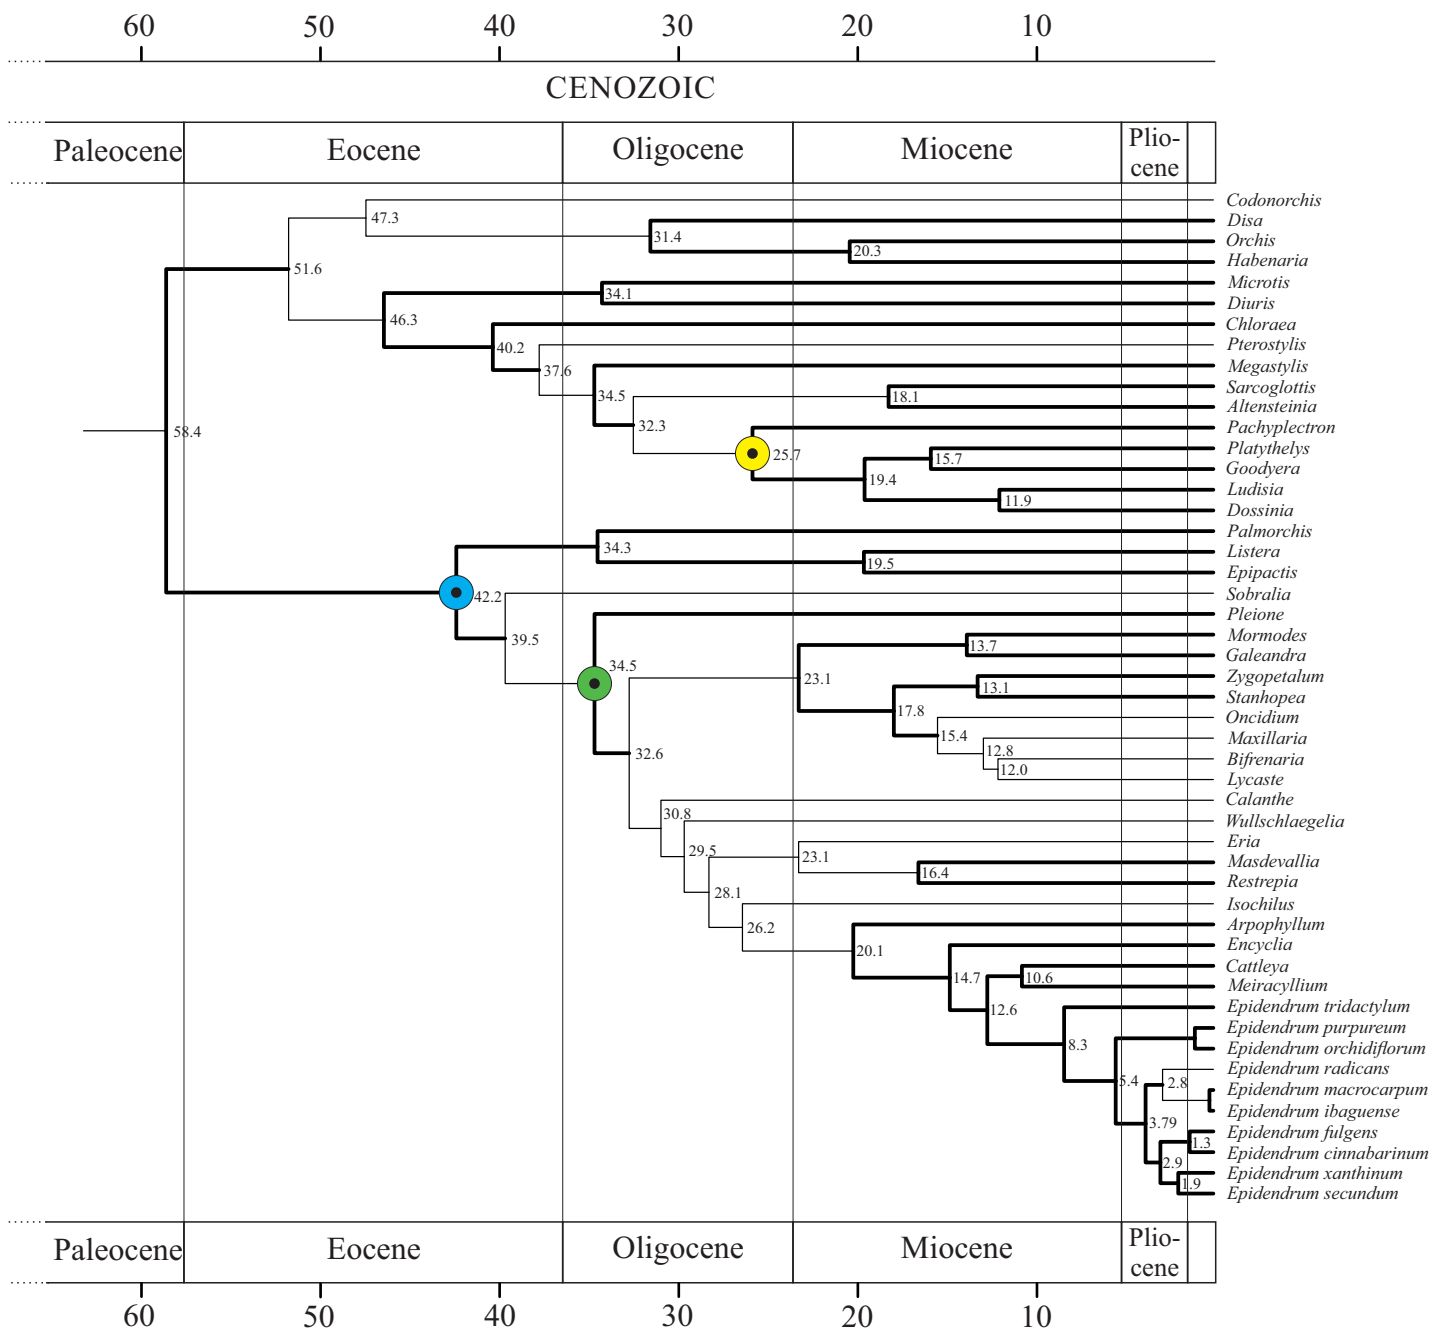

Supplement: 12870_2018_1398_MOESM2_ESM.pdf [file 12870_2018_1398_MOESM2_ESM.pdf]
